# Supplementary material
Source: PubMed Central journal article supplement (PMC2505179)
Supplement: NIHMS61069-supplement-si20060405_102.pdf [file NIHMS61069-supplement-si20060405_102.pdf]

## Supporting Information

# Design and Synthesis of Phosphotyrosine Peptidomimetic Prodrugs

*Hugo Garrido-Hernandez, Kyung D. Moon, Robert L. Geahlen and Richard F. Borch\**

### Elemental Analysis

| Cpd       | Formula                               | Calcd |      |      | Found |      |      |
|-----------|---------------------------------------|-------|------|------|-------|------|------|
|           |                                       | % C   | % H  | % N  | % C   | % H  | % N  |
| <b>8</b>  | $C_{33}H_{42}ClN_4O_9P \cdot H_2O$    | 54.81 | 6.13 | 7.75 | 54.79 | 5.85 | 7.52 |
| <b>9</b>  | $C_{34}H_{44}ClN_4O_9P \cdot 2H_2O$   | 54.08 | 6.41 | 7.42 | 53.87 | 5.89 | 7.25 |
| <b>10</b> | $C_{37}H_{49}ClN_5O_{10}P \cdot H_2O$ | 55.60 | 6.31 | 8.76 | 55.64 | 6.62 | 8.90 |
| <b>16</b> | $C_{33}H_{43}ClN_5O_8P \cdot 3H_2O$   | 52.28 | 6.51 | 9.24 | 52.66 | 5.90 | 8.92 |
| <b>17</b> | $C_{34}H_{45}ClN_5O_8P \cdot H_2O$    | 55.87 | 6.43 | 9.51 | 56.20 | 6.34 | 9.15 |
| <b>18</b> | $C_{37}H_{50}ClN_6O_9P \cdot 3H_2O$   | 52.70 | 6.69 | 9.97 | 52.93 | 6.13 | 9.36 |
